# Supplementary material
Source: PubMed Central journal article supplement (PMC8284087)
Supplement: JZhejiangUnivSciB-22-7-548-s001.pdf [file JZhejiangUnivSciB-22-7-548-s001.pdf]

## Potential effect of EGCG on the anti-tumor efficacy of metformin in melanoma cells

An'an XU<sup>1</sup>, Jeehyun LEE<sup>1</sup>, Yueling ZHAO<sup>1</sup>, Yuefei WANG<sup>1</sup>, Xiaoli LI<sup>2</sup>, Ping XU<sup>1</sup>

<sup>1</sup>Department of Tea Science, Zhejiang University, Hangzhou 310058, China

<sup>2</sup>College of Biosystems Engineering and Food Science, Zhejiang University, Hangzhou 310058, China

**Table S1** qRT-PCR primer sequences (5' to 3')

| Gene           | Primer sequences (5' to 3')  |
|----------------|------------------------------|
| <i>β-actin</i> | F: AGTGTGACGTTGACATCCGT      |
|                | R: GCAGCTCAGTAACAGTCCGC      |
| <i>Il-6</i>    | F: GAAACCGCTATGAAGTTCCTCTCTG |
|                | R: TGTTGGGAGTGGTATCCTCTGTGA  |
| <i>Il-10</i>   | F: TTTAAGGGTTACTTGGGTTGCC    |
|                | R: AATGCTCCTTGATTCTGGGC      |
| <i>Tnf-α</i>   | F: CCCTCACACTCAGATCATCTTCT   |
|                | R: GCTACGACGTGGGCTACAG       |
| <i>Sod1</i>    | F: ATGTGACTGCTGGAAAGGACG     |
|                | R: CGCAATCCCAATCACTCCAC      |
| <i>Sod2</i>    | F: TCCCAGACCTGCCTTACGACT     |
|                | R: CCCTTAGGGCTCAGGTTTGTGTC   |
| <i>Cat</i>     | F: TCACTCAGGTGCGGACATTCT     |
|                | R: GTTCTTAGGCTTCTCAGCGTTGT   |
| <i>Gpx1</i>    | F: CCAGGAGAATGGCAAGAATGA     |
|                | R: GGAAGGTAAAGAGCGGGTGA      |

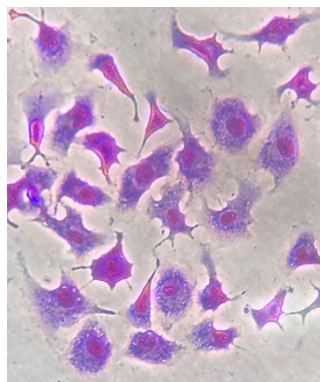

**Fig. S1** Cell crystal violet staining of B16F10.
